# Supplementary material for: Risk of Hospitalization for Adverse Drug Events in Women and Men: A Post-Hoc Analysis of an Active Pharmacovigilance Study in Italian Emergency Departments
Source: Preprints.org preprint supplement (doi:10.20944/preprints202106.0400.v1), 2021-06-15
Supplement: Supplementary file 1 [file supplementary]

**Supplementary Table 1 -** Most commonly reported suspected drugs by patients’ age.

|  | **ED Visits for ADEs** | | **ED Visits for ADEs**  **Resulting in Hospitalization** | |
| --- | --- | --- | --- | --- |
|  | **Women** | **Men** | **Women** | **Men** |
| **Suspected Drug** | **No. of Suspected Drugs**  **N (%)** | **No. of Suspected Drugs**  **N (%)** | **No. of Suspected Drugs**  **N (row %)** | **No. of Suspected Drugs**  **N (row %)** |
| **All patients**  **(N = 18,918 ED visits leading to hospitalized out of 61,855)** | **N=44,119** | **N=34,242** |  |  |
| Warfarin (B01AA03) | 3,640 (8.3) | 3,681 (10.8) | 1317 (36.2) | 1294 (35.2) |
| Amoxicillin and beta-lactamase inhibitor (J01CR02) | 3,013 (6.8) | 2,304 (6.7) | 540 (17.9) | 358 (15.5) |
| Acetylsalicylic acid (B01AC06) | 1,641 (3.7) | 2,512 (7.3) | 611 (37.2) | 912 (36.3) |
| Ketoprofen (M01AE03) | 995 (2.3) | 881 (2.6) | 216 (21.7) | 202 (22.9) |
| Ibuprofen (M01AE01) | 936 (2.1) | 671 (2.0) | 204 (21.8) | 129 (19.2) |
| Amoxicillin (J01CA04) | 908 (2.1) | 727 (2.1) | 149 (16.4) | 116 (16.0) |
| Paracetamol (N02BE01) | 735 (1.7) | 528 (1.5) | 184 (25.0) | 124 (23.5) |
| Levofloxacin (J01MA12) | 652 (1.5) | 538 (1.6) | 174 (26.7) | 147 (27.3) |
| Diclofenac (M01AB05) | 631 (1.4) | - | 175 (27.7) | - |
| Codeine, combination excl. psycholeptics (N02AA59) | 600 (1.4) | - | 149 (24.8) | - |
| Insulin glargine (A10AE04) | - | 593 (1.7) | - | 318 (53.6) |
| Clopidogrel (B01AC04) | - | 586 (1.7) | - | 231 (39.4) |
| **Patients aged ≤19 y**  **(N = 1,071 hospitalized out of 6,260)** | **N=3900** | **N=3656** |  |  |
| Amoxicillin and beta-lactamase inhibitor (J01CR02) | 616 (15.8) | 610 (16.7) | 43 (7.0) | 45 (7.4) |
| Ibuprofen (M01AE01) | 221 (5.7) | 207 (5.7) | 33 (14.9) | 25 (12.1) |
| Amoxicillin (J01CA04) | 186 (4.8) | 225 (6.2) | 12 (6.5) | 11 (4.9) |
| Diphtheria-haemophilus influenzae B-pertussis-poliomyelitis-tetanus-hepatitis B (J07CA09) | 148 (3.8) | 169 (4.6) | 14 (9.5) | 21 (12.4) |
| Paracetamol (N02BE01) | 134 (3.4) | 141 (3.9) | 34 (25.4) | 22 (15.6) |
| Pneumococcus, purified polysaccharides antigen conjugated (J07AL02) | 130 (3.3) | 129 (3.5) | 16 (12.3) | 17 (13.2) |
| Ketoprofen (M01AE03) | 111 (2.9) | 93 (2.5) | 29 (26.1) | 14 (15.1) |
| Measles, combinations with mumps and rubella, live attenuated (J07BD52) | 104 (2.7) | 125 (3.4) | 7 (6.7) | 7 (5.6) |
| Clarithromycin (J01FA09) | 94 (2.4) | 95 (2.6) | 6 (6.4) | 13 (13.7) |
| Cefixime (J01DD08) | 64 (1.6) | - | 2 (3.1) | - |
| Diphtheria-pertussis-poliomyelitis-tetanus (J07CA02) | - | 91 (2.5) | - | 4 (4.40) |
| **Patients aged ≥65 y**  **(N = 11,296 hospitalized out of 29,241)** | **N=20,767** | **N=16,587** |  |  |
| Warfarin (B01AA03) | 3294 (15.9) | 3157 (19.0) | 1209 (36.7) | 1124 (35.6) |
| Acetylsalicylic acid (B01AC06) | 1382 (6.7) | 1972 (11.9) | 539 (39.0) | 747 (37.9) |
| Amoxicillin and beta-lactamase inhibitor (J01CR02) | 581 (2.8) | 328 (2.0) | 171 (29.4) | 75 (22.9) |
| Insulin glargine (A10AE04) | 399 (1.9) | 336 (2.0) | 217 (54.4) | 202 (60.1) |
| Furosemide (C03CA01) | 377 (1.8) | 246 (1.5) | 214 (56.8) | 135 (54.9) |
| Metformin (A10BA02) | 360 (1.7) | 262 (1.6) | 212 (58.9) | 165 (63.0) |
| Levofloxacin (J01MA12) | 298 (1.4) | 245 (1.5) | 104 (34.9) | 88 (35.9) |
| Clopidogrel (B01AC04) | 273 (1.7) | 466 (2.8) | 109 (39.9) | 193 (41.4) |
| Acenocoumarol (B01AA07) | 272 (1.3) | 345 (2.1) | 124 (45.6) | 144 (41.7) |
| Codeine, combination excl. psycholeptics (N02AA59) | 267 (1.3) | - | 74 (27.7) | - |
| Ramipril (C09AA05) | - | 245 (1.5) | - | 113 (46.1) |

ED: emergency department
